# Supplementary material for: A straightforward approach for one-pot synthesis of noncovalently connected graft copolymers with unique self-assembly nanostructures
Source: Royal Society of Chemistry journal article supplement (doi:10.1039/c6py01509c), 2016-01-01
Supplement: c6py01509c1.pdf [file c6py01509c1.pdf]

Electronic Supplementary Information

**A straightforward approach for one-pot synthesis of  
noncovalently connected graft copolymers with unique self-  
assembly nanostructures**

Liang Ding,<sup>\*a</sup> Wei Song,<sup>\*a</sup> Ruiyu Jiang,<sup>a</sup> Lei Zhu<sup>\*b</sup>

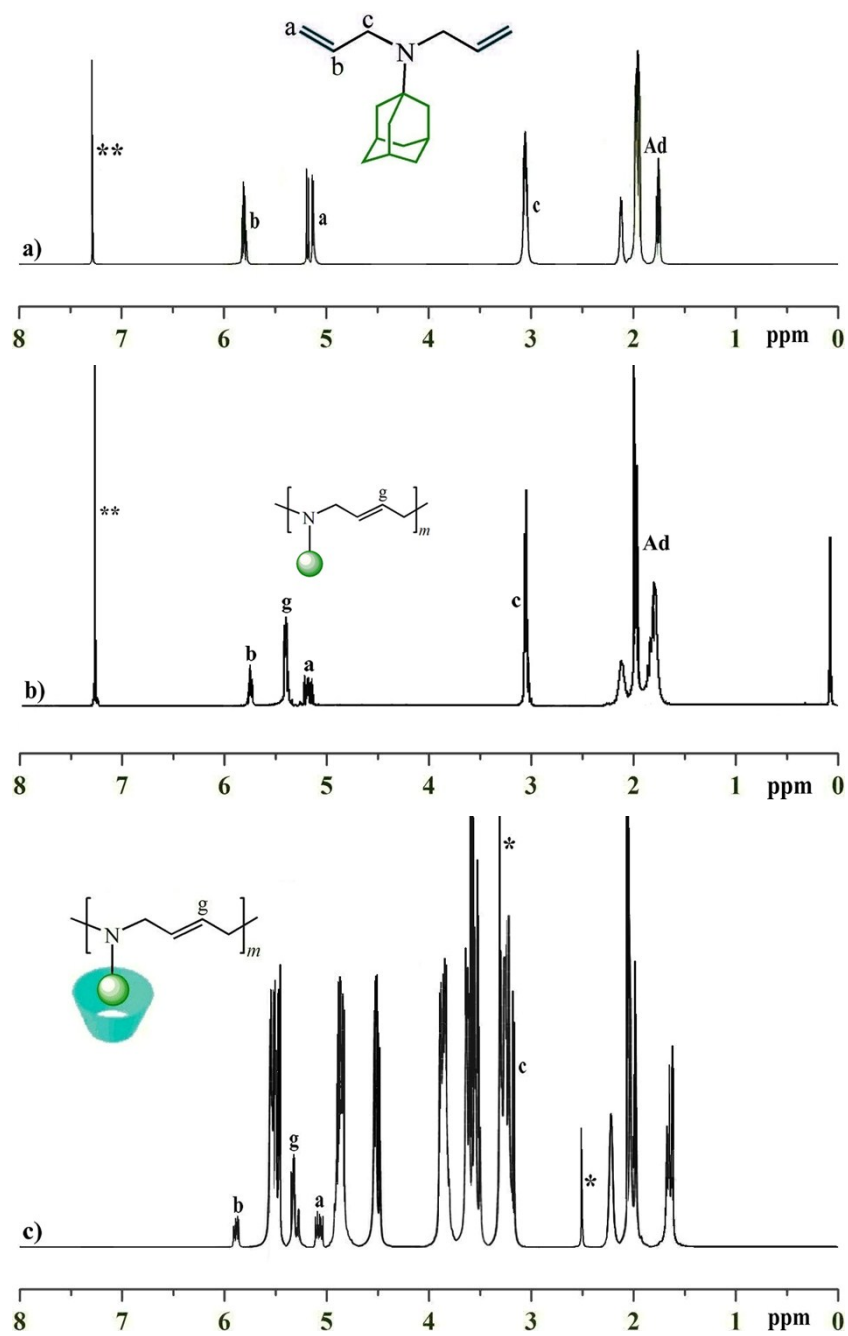

**Fig. S1**  $^1\text{H}$  NMR spectra for (a) Ad-diene monomer, **1a**, (b) linear polymer, **1a**, and (c) supramolecular graft copolymer, **1a**. (\*\*  $\text{CDCl}_3$ , \*  $\text{DMSO}-d_6$  and  $\text{H}_2\text{O}$ )

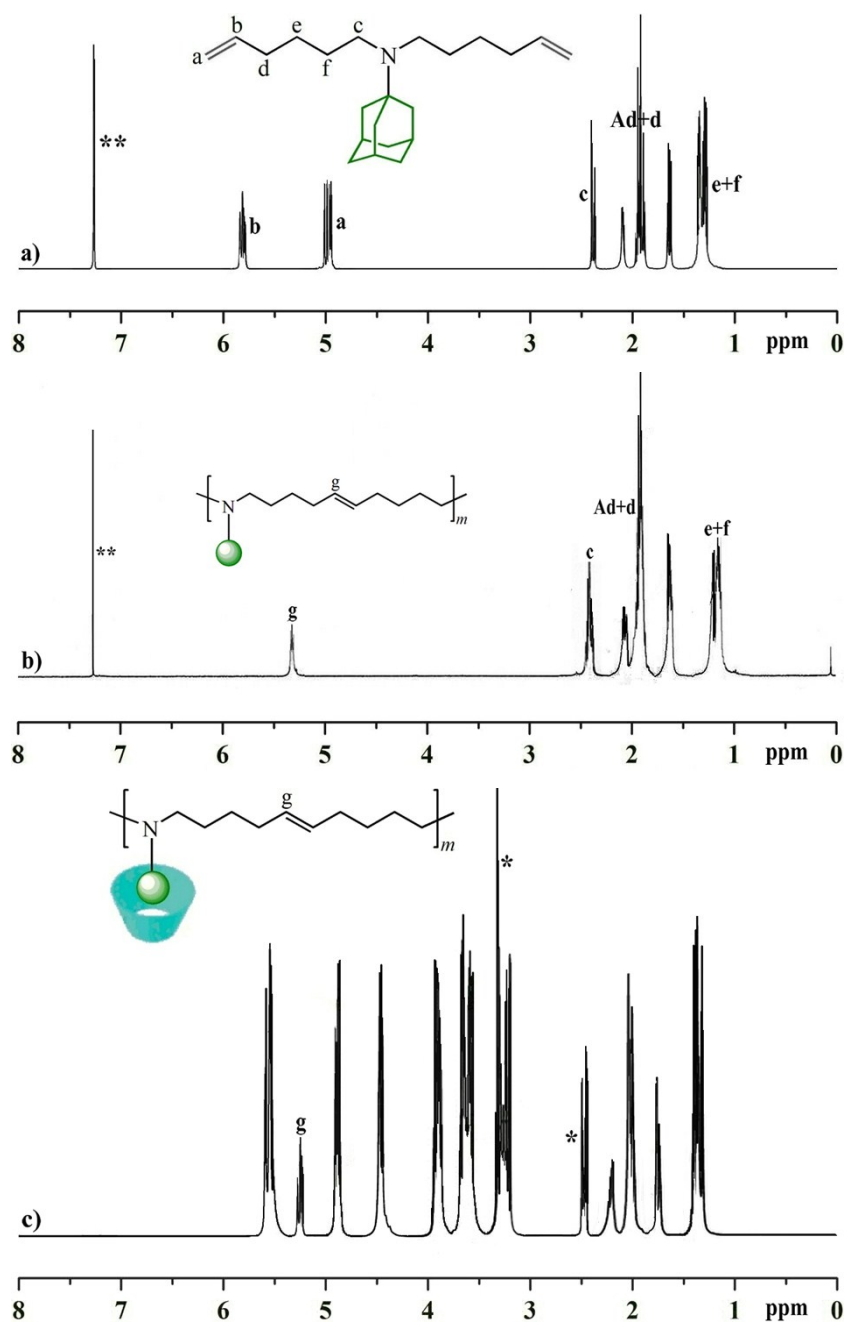

**Fig. S2**  $^1\text{H}$  NMR spectra for (a) Ad-diene monomer, **1b**, (b) linear polymer, **1b**, and (c) supramolecular graft copolymer, **1b**. (\*\*  $\text{CDCl}_3$ , \*  $\text{DMSO-}d_6$  and  $\text{H}_2\text{O}$ )

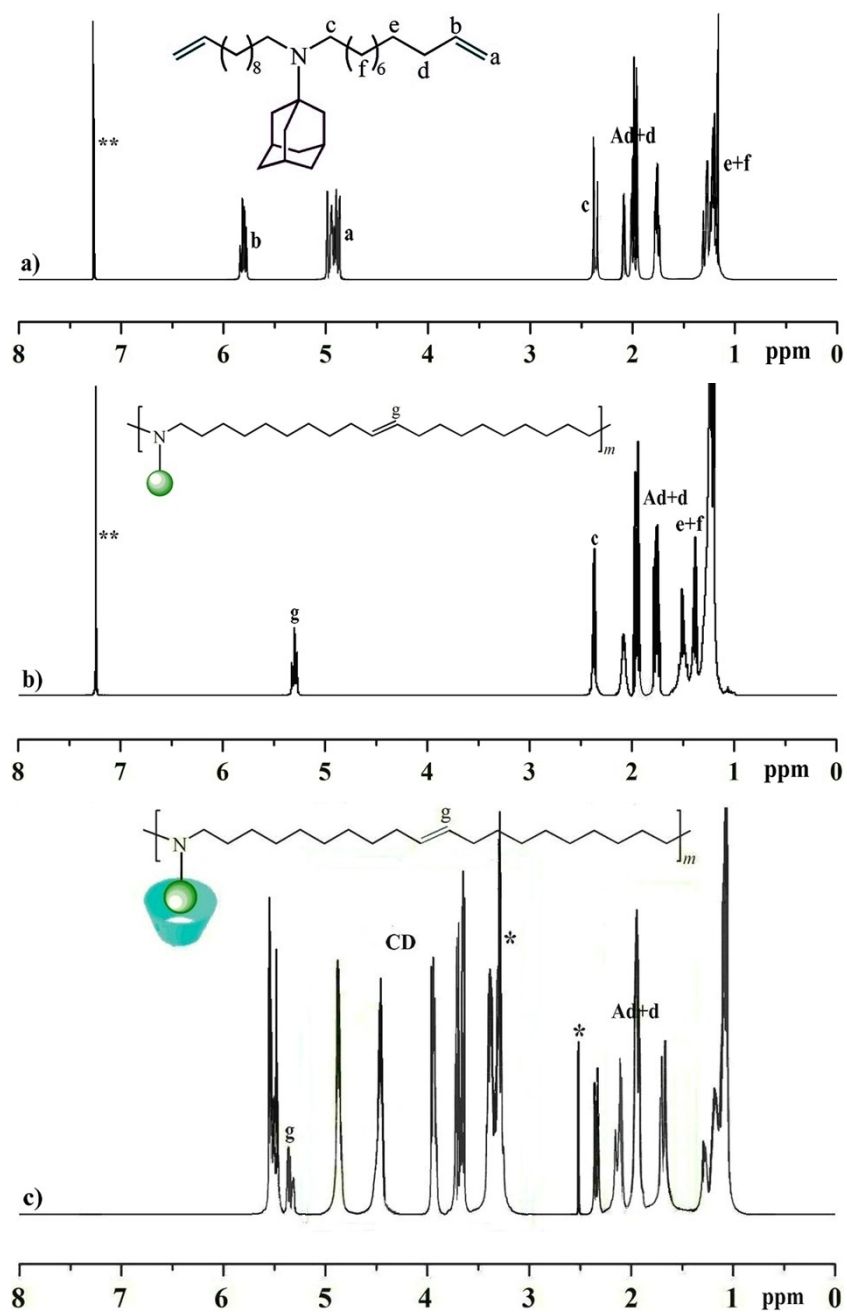

**Fig. S3**  $^1\text{H}$  NMR spectra for (a) Ad-diene monomer, **1c**, (b) linear polymer, **1c**, and (c) supramolecular graft copolymer, **1c**. (\*\* CDCl<sub>3</sub>, \* DMSO-*d*<sub>6</sub> and H<sub>2</sub>O)

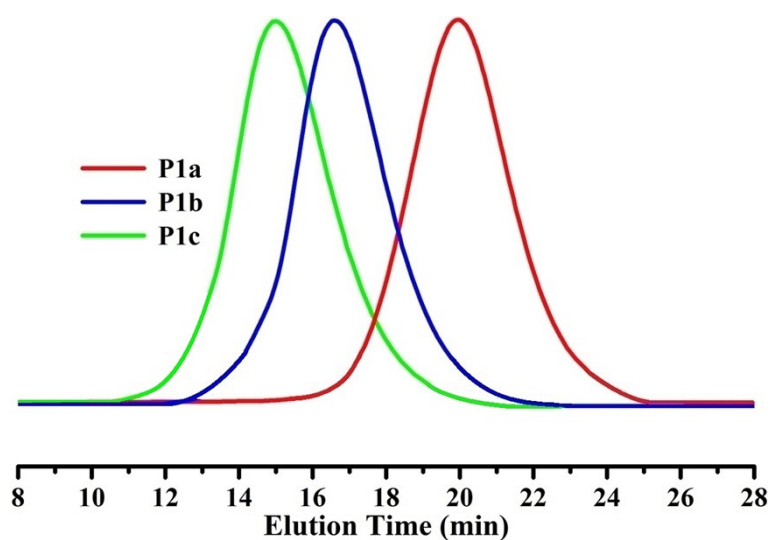

**Fig. S4** GPC traces of the Polymers via ADMET polymerization of Ad-diene monomers using **C3** as catalyst.

**Table S1** Conditions for ADMET polymerization of Ad-diene monomers and analytical data of the polymers<sup>a</sup>

| Entry | Monomer   | Catalyst  | Yield (%) <sup>b</sup> | T (°C) | $M_{n,GPC}^c$ | $M_w/M_n^c$ |
|-------|-----------|-----------|------------------------|--------|---------------|-------------|
| 1     | <b>1a</b> | <b>C1</b> | –                      | 60     | –             | –           |
| 2     | <b>1a</b> | <b>C2</b> | 87                     | 60     | 2100          | 2.05        |
| 3     | <b>1a</b> | <b>C3</b> | 84                     | 60     | 1600          | 1.70        |
| 4     | <b>1a</b> | <b>C3</b> | 90                     | 80     | 1800          | 1.88        |
| 5     | <b>1b</b> | <b>C1</b> | 84                     | 60     | 4300          | 1.65        |
| 6     | <b>1b</b> | <b>C2</b> | 75                     | 60     | 7200          | 1.83        |
| 7     | <b>1b</b> | <b>C3</b> | 86                     | 60     | 5700          | 1.66        |
| 8     | <b>1b</b> | <b>C3</b> | 86                     | 80     | 6100          | 1.75        |
| 9     | <b>1c</b> | <b>C1</b> | 89                     | 60     | 7500          | 1.58        |
| 10    | <b>1c</b> | <b>C2</b> | 82                     | 60     | 11200         | 1.82        |
| 11    | <b>1c</b> | <b>C3</b> | 93                     | 60     | 9300          | 1.64        |
| 12    | <b>1c</b> | <b>C3</b> | 91                     | 80     | 10100         | 1.79        |

<sup>a</sup> Polymerizations were conducted at 60–80 °C for 24 h using  $[M/C]_0 = 50: 1$ .

<sup>b</sup> Isolated yield after precipitation, and obtained gravimetrically from the dried polymer.

<sup>c</sup> Determined by GPC in THF relative to monodispersed polystyrene standards.

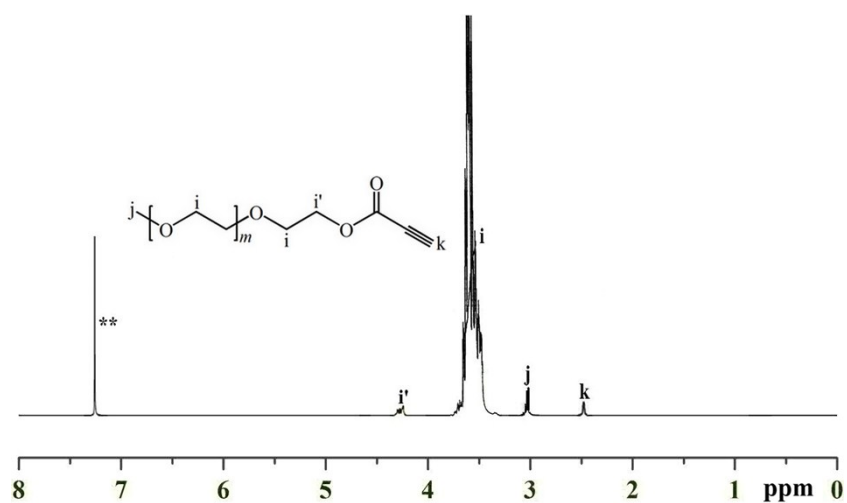

**Fig. S5** <sup>1</sup>H NMR spectrum for alkyne-ended MPEG. (\*\* CDCl<sub>3</sub>)

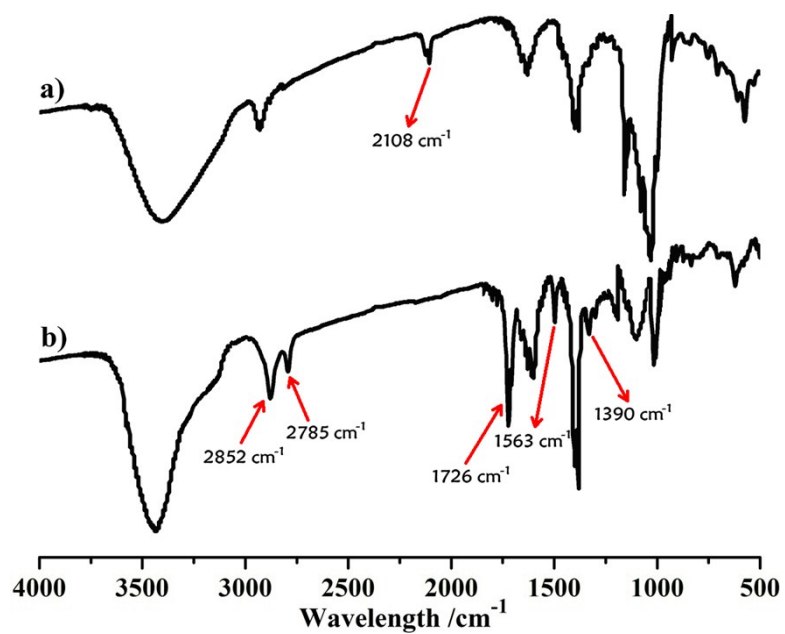

**Fig. S6** ATR-IR spectra for (a) azide-modified  $\beta$ -CD and (b) MPEG-substituted  $\beta$ -CD.

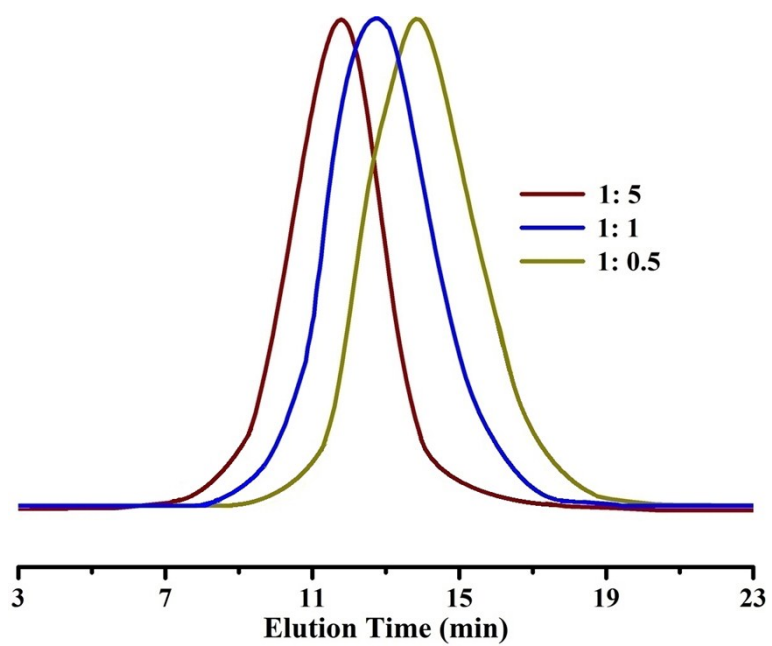

**Fig. S7** GPC traces of supramolecular graft copolymer, **1c** by ADMET polymerization using different ratios of **M1c**/MPEG- $\beta$ -CD.

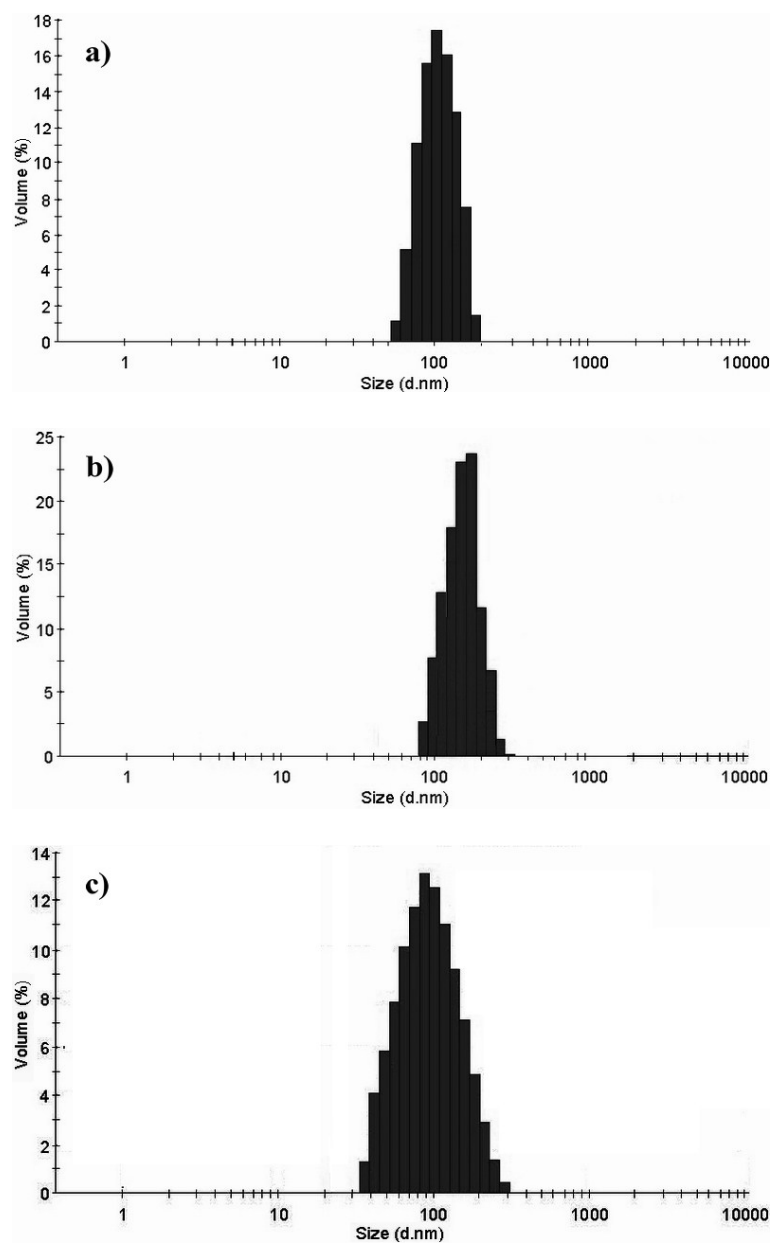

**Fig. S8** Size and distribution of polymeric nanoparticles determined by means of DLS (a) SG-P1a, (b) SG-P1c, and (c) L-P1c.



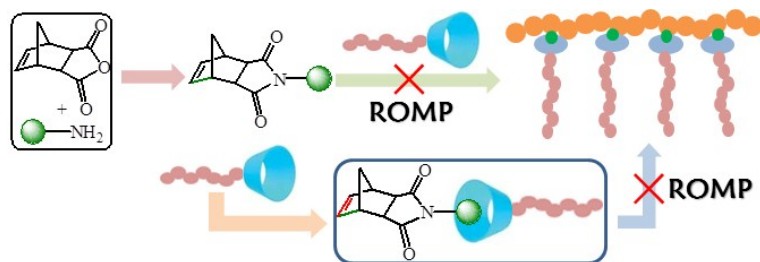

Scheme S1 Schematic Illustration of Supramolecular Graft Copolymer via One-Pot ROMP and the Host-Guest Recognition.

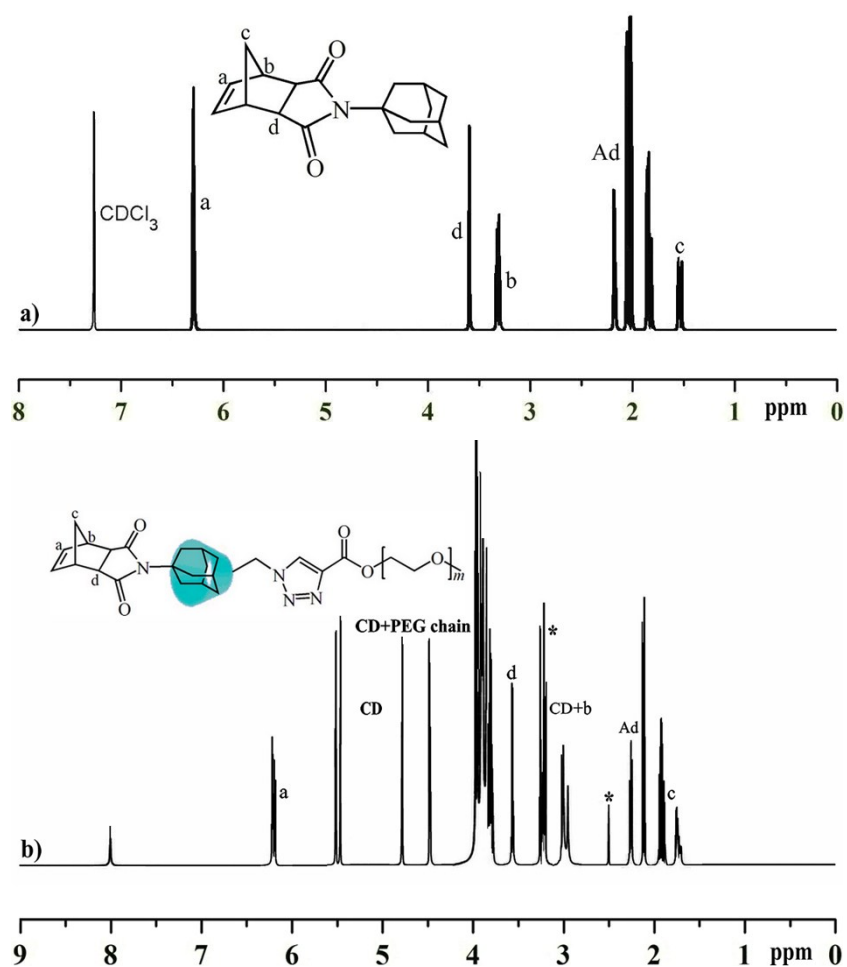

Fig. S9  $^1\text{H}$  NMR spectra for (a) Ad-ROMP monomer and (b) supramolecular macromonomer. (\*  $\text{DMSO-}d_6$  and  $\text{H}_2\text{O}$ )

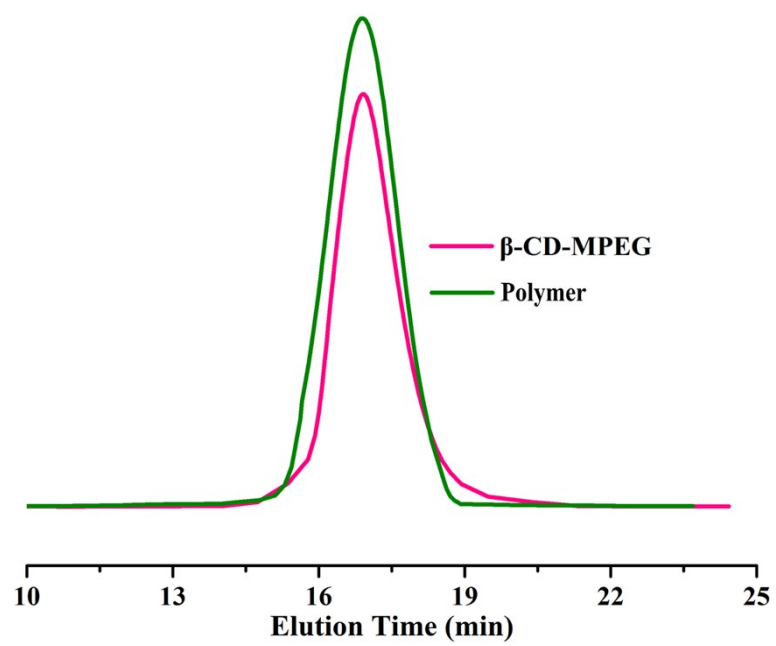

**Fig. S10** GPC traces of MPEG- $\beta$ -CD and polymer obtained by ROMP.
